# Supplementary material
Source: PubMed Central journal article supplement (PMC3719697)
Supplement: AAC.00670-13_zac999102006so1.pdf [file AAC.00670-13_zac999102006so1.pdf]

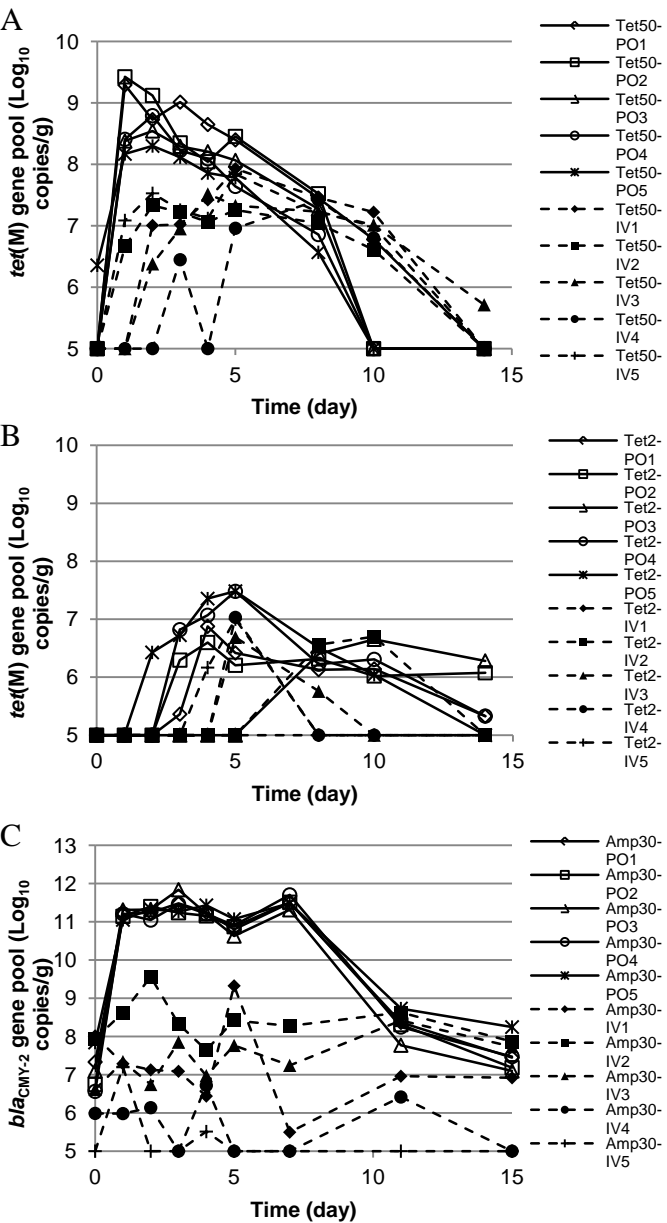

Fig. S1. Real-time quantification of AR gene pools in individual mouse subjects included in Fig. 1. Inoculated mice were administered with tetracycline hydrochloride in 50 mg/kg body weight/day (A), 2 mg/kg body weight/day (B), or ampicillin sodium in 30 mg/kg body weight/day (C).

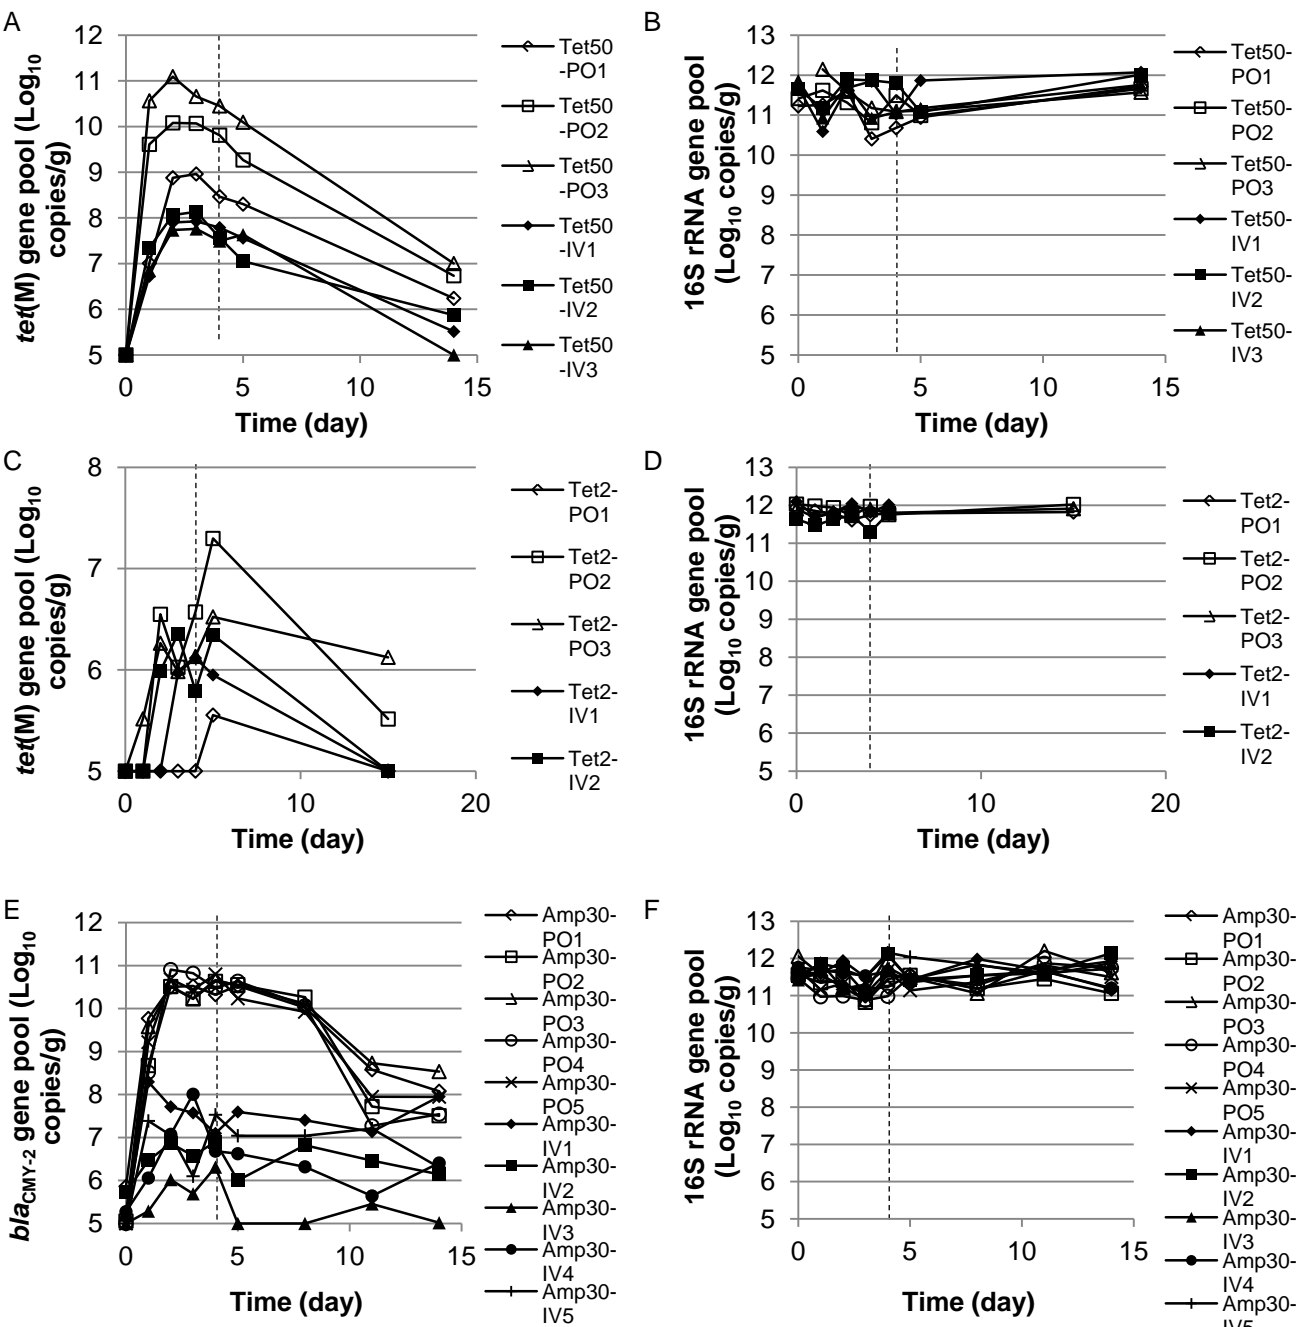

Fig. S2. Real-time quantification of AR gene pools upon corresponding antibiotic exposure (additional repeats). Inoculated mice were administered with tetracycline hydrochloride in 50 mg/kg body weight/day (A, B), 2 mg/kg body weight/day (C, D), or ampicillin sodium in 30 mg/kg body weight/day (E, F). Data were presented with *tet(M)* gene pool (A, C), *bla*<sub>CMY-2</sub> gene pool (E) and corresponding 16S rRNA gene pool (B, D, F).

--- Last day of antibiotic administration.

Detection limit of AR gene pools in this study is  $10^5$  copies/g. Data were presented as detection limit if below detection limit.
